# Supplementary material
Source: PubMed Central journal article supplement (PMC9228691)
Supplement: sj-pdf-1-epm-10.1177_00131644211033902.pdf [file sj-pdf-1-epm-10.1177_00131644211033902.pdf]

**Robustness of Adaptive Measurement of Change to Item Parameter Estimation Error**

**Supplemental Tables and Figures**

Table S1

*Classical effect sizes ( $\eta^2$ ) from a two-way analysis of variance (ANOVA) on false positive rates, true positive rates, average test length, and change recovery in Simulation 2*

| Factor                       | $\eta^2$     | Sum of Squares | DF   |
|------------------------------|--------------|----------------|------|
| <i>False Positive Rates</i>  |              |                |      |
| Starting $\theta$ (Trait)    | <b>0.123</b> | 0.007          | 10   |
| Calibration Size (Size)      | <b>0.068</b> | 0.004          | 4    |
| AMC Hypothesis Test (Test)   | <b>0.112</b> | 0.006          | 2    |
| Trait $\times$ Size          | <b>0.268</b> | 0.015          | 40   |
| Trait $\times$ Test          | <b>0.206</b> | 0.012          | 20   |
| Size $\times$ Test           | <b>0.027</b> | 0.002          | 8    |
| Residuals                    | -            | 0.011          | 80   |
| <i>True Positive Rates</i>   |              |                |      |
| Starting $\theta$ (Trait)    | <b>0.021</b> | 0.207          | 10   |
| Calibration Size (Size)      | 0.005        | 0.048          | 4    |
| AMC Hypothesis Test (Test)   | <b>0.131</b> | 1.276          | 2    |
| True Change (Change)         | <b>0.641</b> | 6.228          | 8    |
| Trait $\times$ Size          | <b>0.066</b> | 0.644          | 40   |
| Trait $\times$ Test          | <b>0.039</b> | 0.374          | 20   |
| Trait $\times$ Change        | 0.018        | 0.174          | 80   |
| Size $\times$ Test           | 0.000        | 0.004          | 8    |
| Size $\times$ Change         | 0.005        | 0.049          | 32   |
| Test $\times$ Change         | 0.010        | 0.095          | 16   |
| Residuals                    | -            | 0.618          | 1264 |
| <i>Average Test Length</i>   |              |                |      |
| Starting $\theta$ (Trait)    | <b>0.022</b> | 229.840        | 10   |
| Calibration Size (Size)      | 0.002        | 20.421         | 4    |
| AMC Hypothesis Test (Test)   | <b>0.096</b> | 1018.513       | 2    |
| True Change (Change)         | <b>0.494</b> | 5240.393       | 9    |
| Trait $\times$ Size          | <b>0.046</b> | 485.211        | 40   |
| Trait $\times$ Test          | <b>0.103</b> | 1089.499       | 20   |
| Trait $\times$ Change        | <b>0.020</b> | 214.723        | 90   |
| Size $\times$ Test           | 0.004        | 40.999         | 8    |
| Size $\times$ Change         | 0.008        | 85.134         | 36   |
| Test $\times$ Change         | <b>0.068</b> | 725.197        | 18   |
| Residuals                    | -            | 1456.837       | 1412 |
| <i>Change Recovery Index</i> |              |                |      |
| Starting $\theta$ (Trait)    | <b>0.135</b> | 3.178          | 10   |
| Calibration Size (Size)      | <b>0.086</b> | 2.020          | 4    |
| AMC Hypothesis Test (Test)   | <b>0.021</b> | 0.489          | 2    |
| True Change (Change)         | <b>0.023</b> | 0.551          | 9    |
| Trait $\times$ Size          | <b>0.082</b> | 1.932          | 40   |
| Trait $\times$ Test          | <b>0.253</b> | 5.940          | 20   |

|                |              |       |      |
|----------------|--------------|-------|------|
| Trait × Change | <b>0.053</b> | 1.243 | 90   |
| Size × Test    | <b>0.022</b> | 0.514 | 8    |
| Size × Change  | <b>0.090</b> | 2.111 | 36   |
| Test × Change  | <b>0.023</b> | 0.533 | 18   |
| Residuals      | -            | 4.979 | 1412 |

---

*Note.* Classical effect sizes greater than or equal to 0.02 have been bolded.

---

Table S2

*Classical effect sizes ( $\eta^2$ ) from a two-way analysis of variance (ANOVA) on false positive rates, true positive rates, average test length, and change recovery in Simulation 3*

| Factor                       | $\eta^2$     | Sum of Squares | DF  |
|------------------------------|--------------|----------------|-----|
| <i>False Positive Rates</i>  |              |                |     |
| Starting $\theta$ (Trait)    | <b>0.043</b> | 0.032          | 10  |
| Item Bank (Bank)             | <b>0.789</b> | 0.590          | 2   |
| AMC Hypothesis Test (Test)   | 0.005        | 0.004          | 2   |
| Trait $\times$ Bank          | <b>0.150</b> | 0.112          | 20  |
| Trait $\times$ Test          | 0.008        | 0.006          | 20  |
| Bank $\times$ Test           | 0.000        | 0.000          | 4   |
| Residuals                    | -            | 0.002          | 40  |
| <i>True Positive Rates</i>   |              |                |     |
| Starting $\theta$ (Trait)    | <b>0.087</b> | 0.911          | 10  |
| Item Bank (Bank)             | <b>0.092</b> | 0.960          | 2   |
| AMC Hypothesis Test (Test)   | 0.012        | 0.125          | 2   |
| True Change (Change)         | <b>0.563</b> | 5.896          | 8   |
| Trait $\times$ Bank          | <b>0.121</b> | 1.261          | 20  |
| Trait $\times$ Test          | 0.010        | 0.103          | 20  |
| Trait $\times$ Change        | <b>0.044</b> | 0.456          | 80  |
| Bank $\times$ Test           | 0.000        | 0.003          | 4   |
| Bank $\times$ Change         | <b>0.021</b> | 0.223          | 16  |
| Test $\times$ Change         | 0.002        | 0.019          | 16  |
| Residuals                    | -            | 0.506          | 712 |
| <i>Average Test Length</i>   |              |                |     |
| Starting $\theta$ (Trait)    | <b>0.043</b> | 1379.015       | 10  |
| Item Bank (Bank)             | <b>0.168</b> | 5388.399       | 2   |
| AMC Hypothesis Test (Test)   | 0.002        | 75.811         | 2   |
| True Change (Change)         | <b>0.630</b> | 20149.188      | 9   |
| Trait $\times$ Bank          | <b>0.069</b> | 2213.930       | 20  |
| Trait $\times$ Test          | 0.013        | 416.021        | 20  |
| Trait $\times$ Change        | <b>0.020</b> | 652.265        | 90  |
| Bank $\times$ Test           | 0.000        | 0.735          | 4   |
| Bank $\times$ Change         | 0.007        | 212.849        | 18  |
| Test $\times$ Change         | 0.009        | 276.738        | 18  |
| Residuals                    | -            | 1232.674       | 796 |
| <i>Change Recovery Index</i> |              |                |     |
| Starting $\theta$ (Trait)    | <b>0.062</b> | 1.041          | 10  |
| Item Bank (Bank)             | <b>0.161</b> | 2.699          | 2   |
| AMC Hypothesis Test (Test)   | 0.002        | 0.034          | 2   |
| True Change (Change)         | <b>0.365</b> | 6.127          | 9   |
| Trait $\times$ Bank          | <b>0.122</b> | 2.049          | 20  |
| Trait $\times$ Test          | <b>0.021</b> | 0.345          | 20  |

|                |              |       |     |
|----------------|--------------|-------|-----|
| Trait × Change | <b>0.160</b> | 2.690 | 90  |
| Bank × Test    | 0.000        | 0.007 | 4   |
| Bank × Change  | <b>0.025</b> | 0.421 | 18  |
| Test × Change  | 0.004        | 0.063 | 18  |
| Residuals      | -            | 1.292 | 796 |

---

*Note.* Classical effect sizes greater than or equal to 0.02 have been bolded.

---

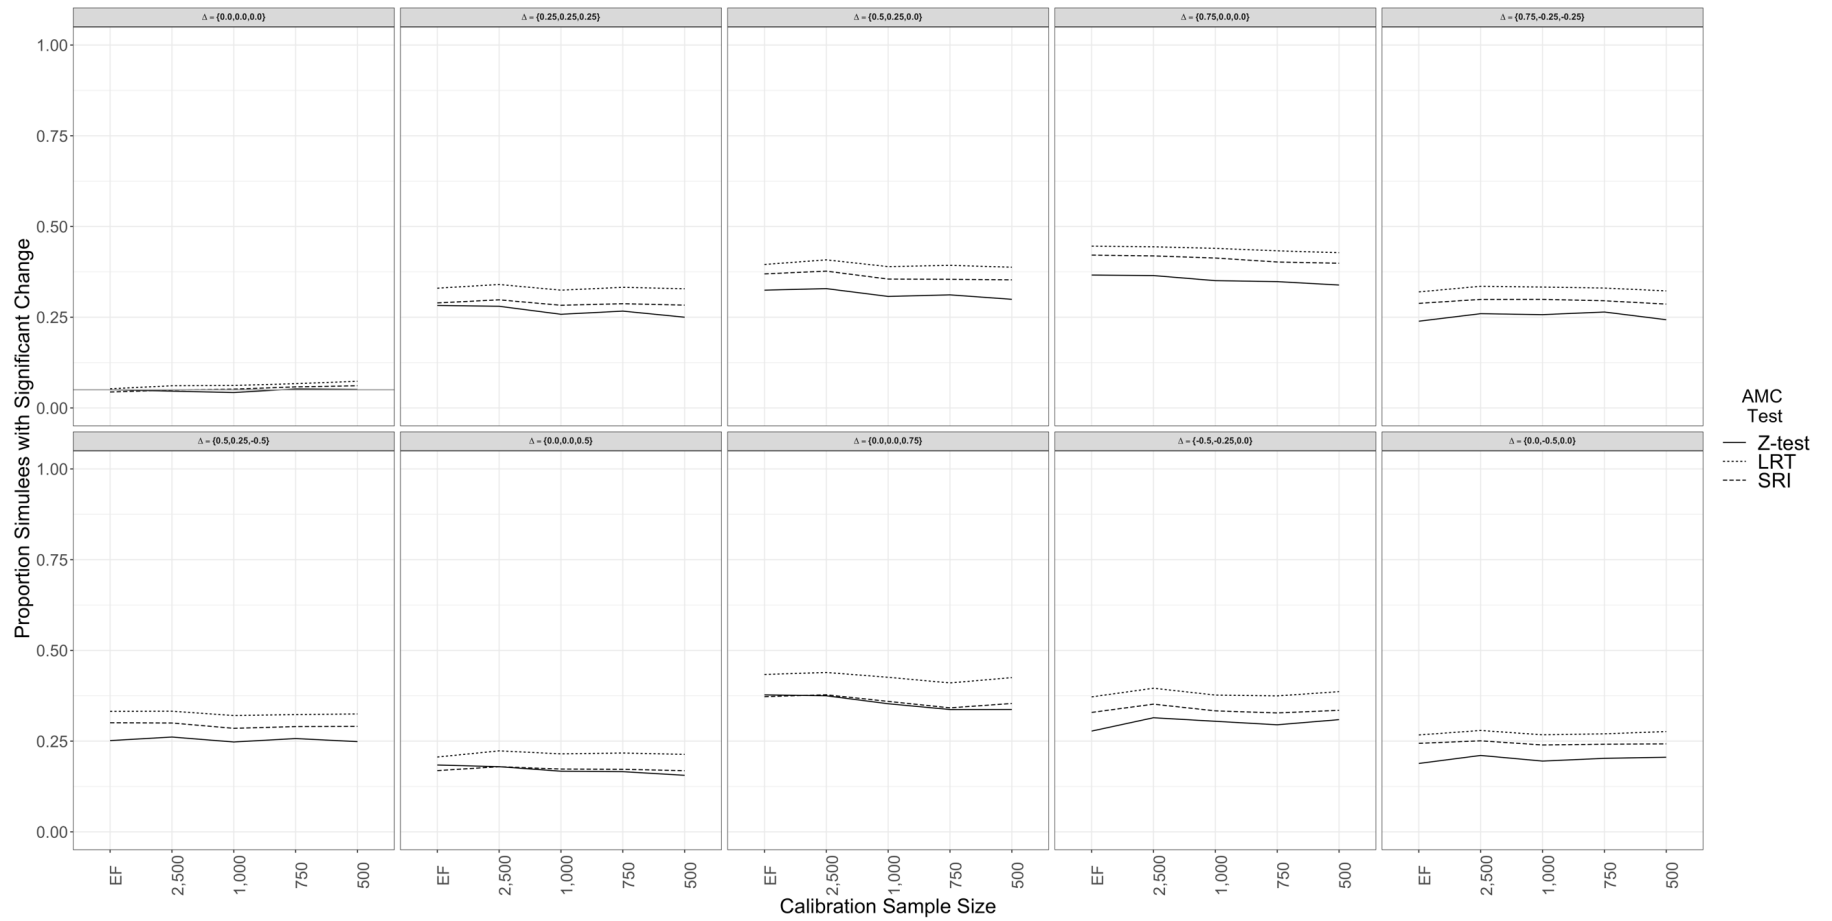

Figure S1. FPRs (Panel 1) and TPRs (Panels 2-10) for three AMC hypothesis tests at the fourth testing occasion across 10  $\theta$  change trajectories in Simulation 2 conditioning on calibration sample size.

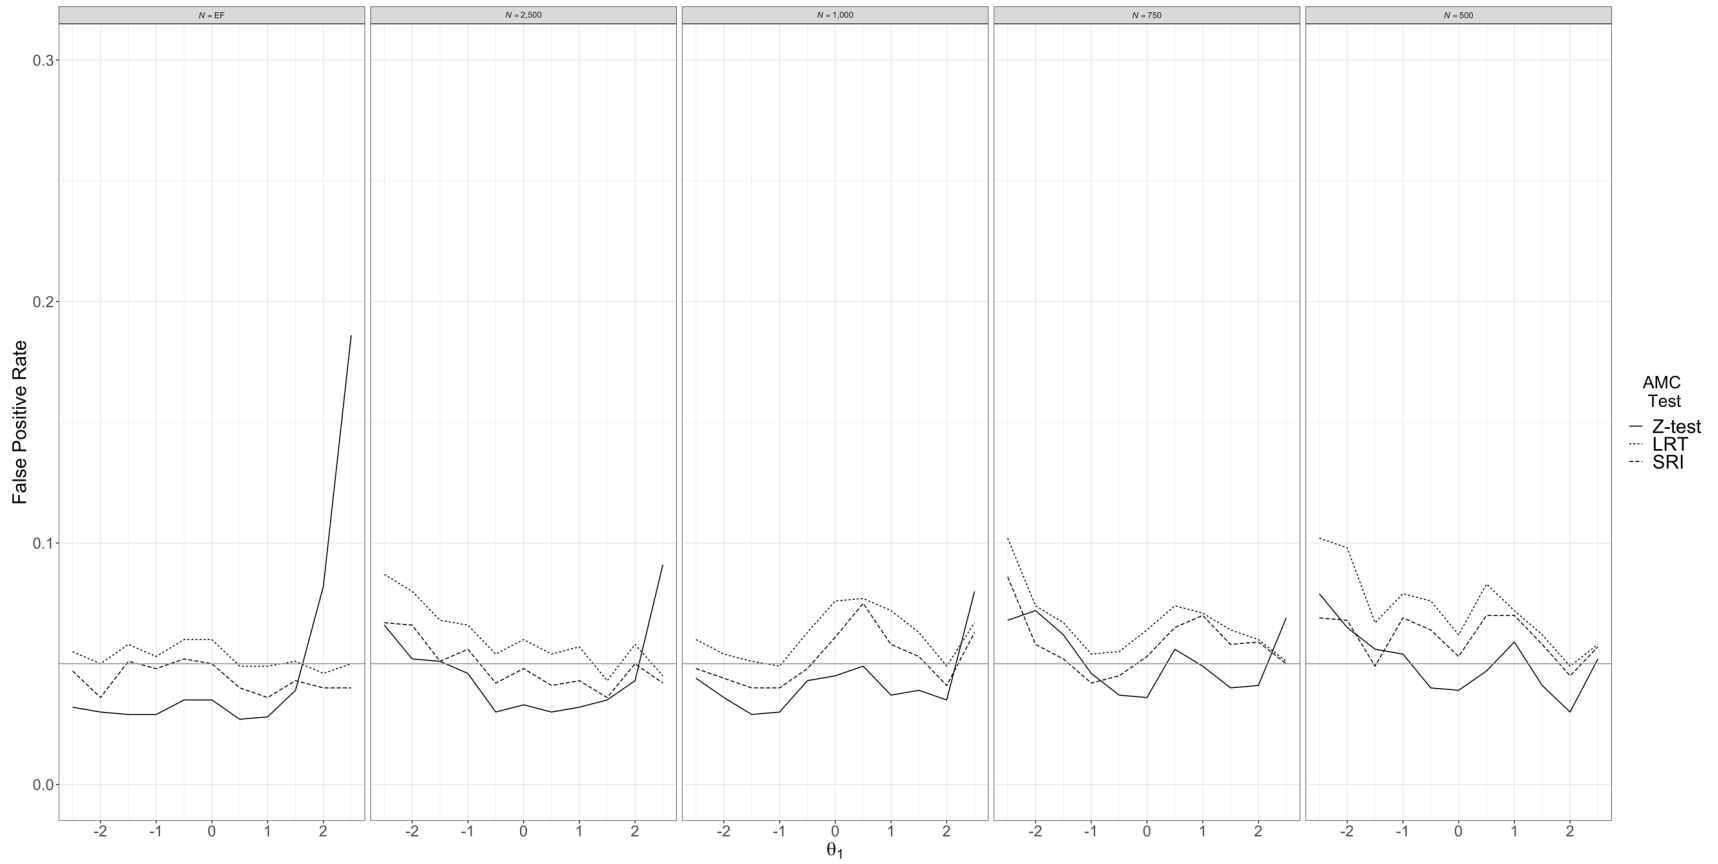

Figure S2. FPRs for three AMC hypothesis tests across decreasing calibration sample sizes when conditioning on  $\theta_1$  in Simulation 2.

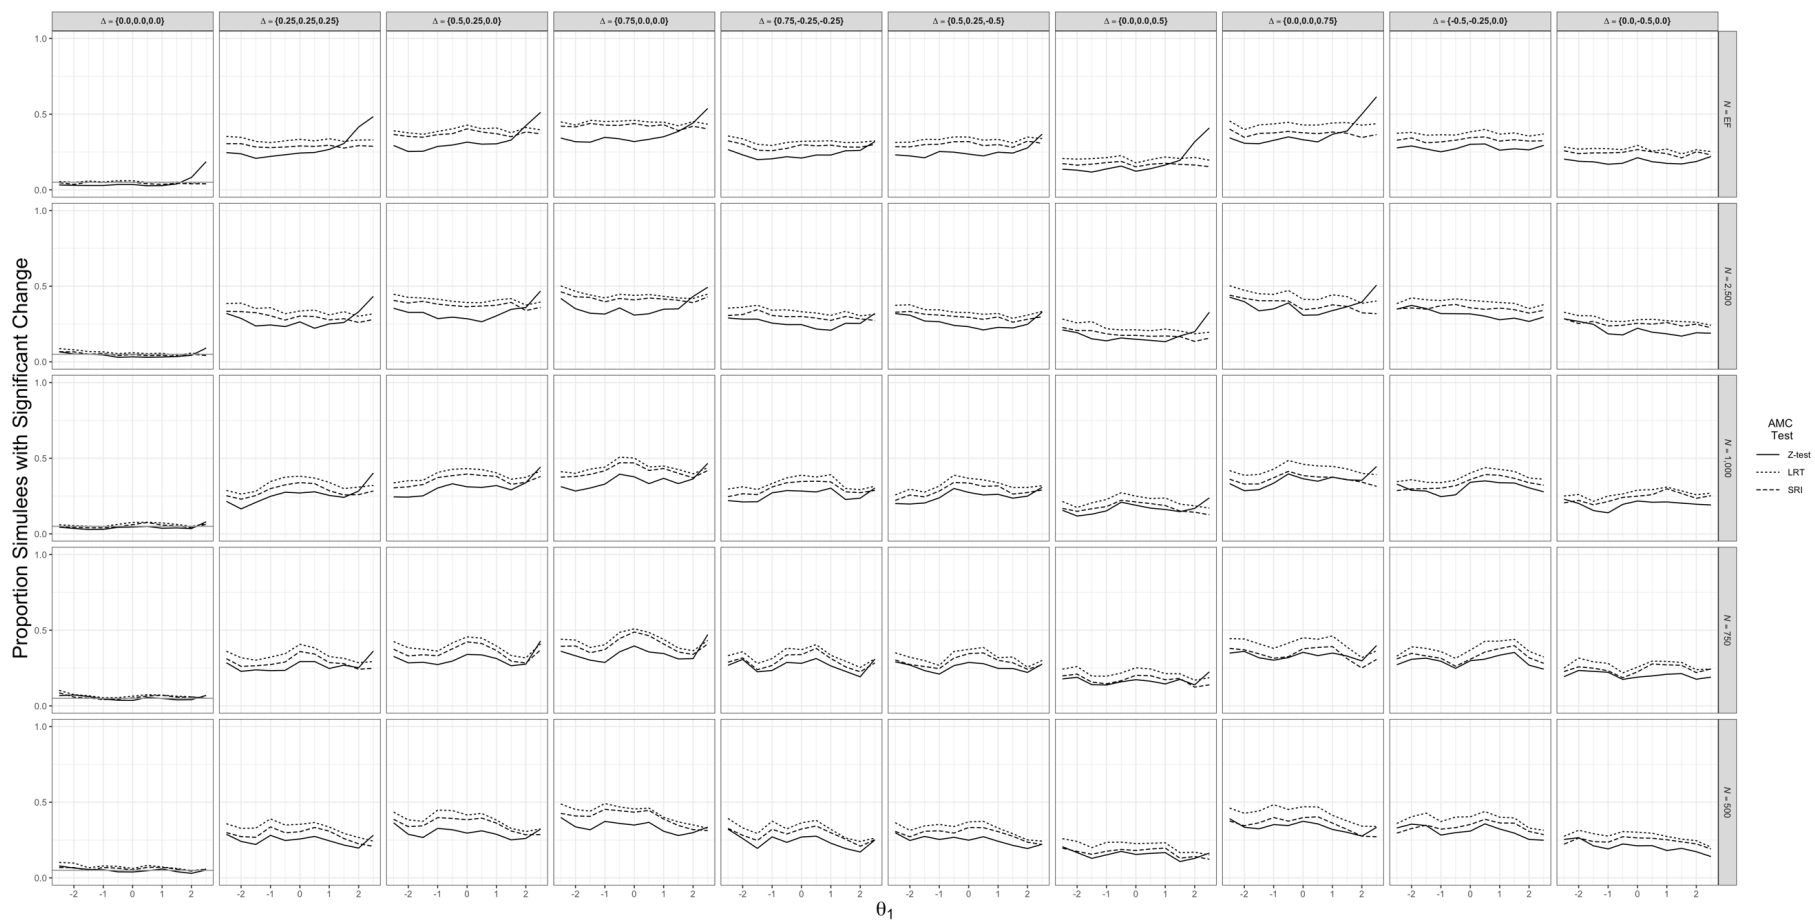

Figure S3. FPRs (Panel 1) and TPRs (Panels 2-10) for three AMC hypothesis tests across 10  $\theta$  change trajectories when conditioning on  $\theta_1$  in Simulation 2.



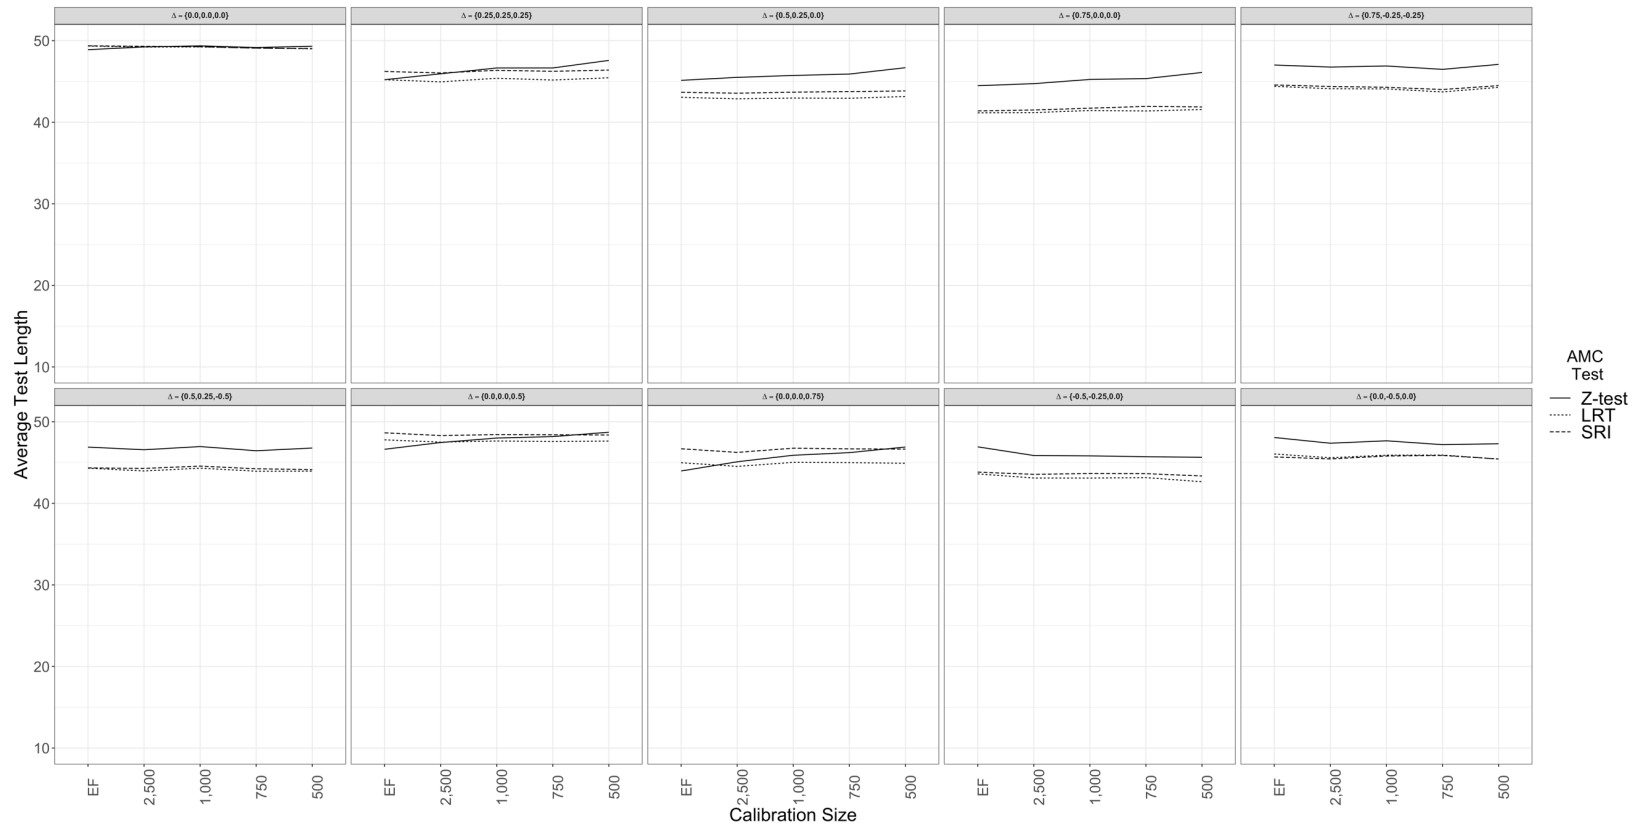

Figure S4. ATL for three AMC hypothesis tests at the fourth testing occasion across 10  $\theta$  change trajectories in Simulation 2 conditioning on calibration sample size.

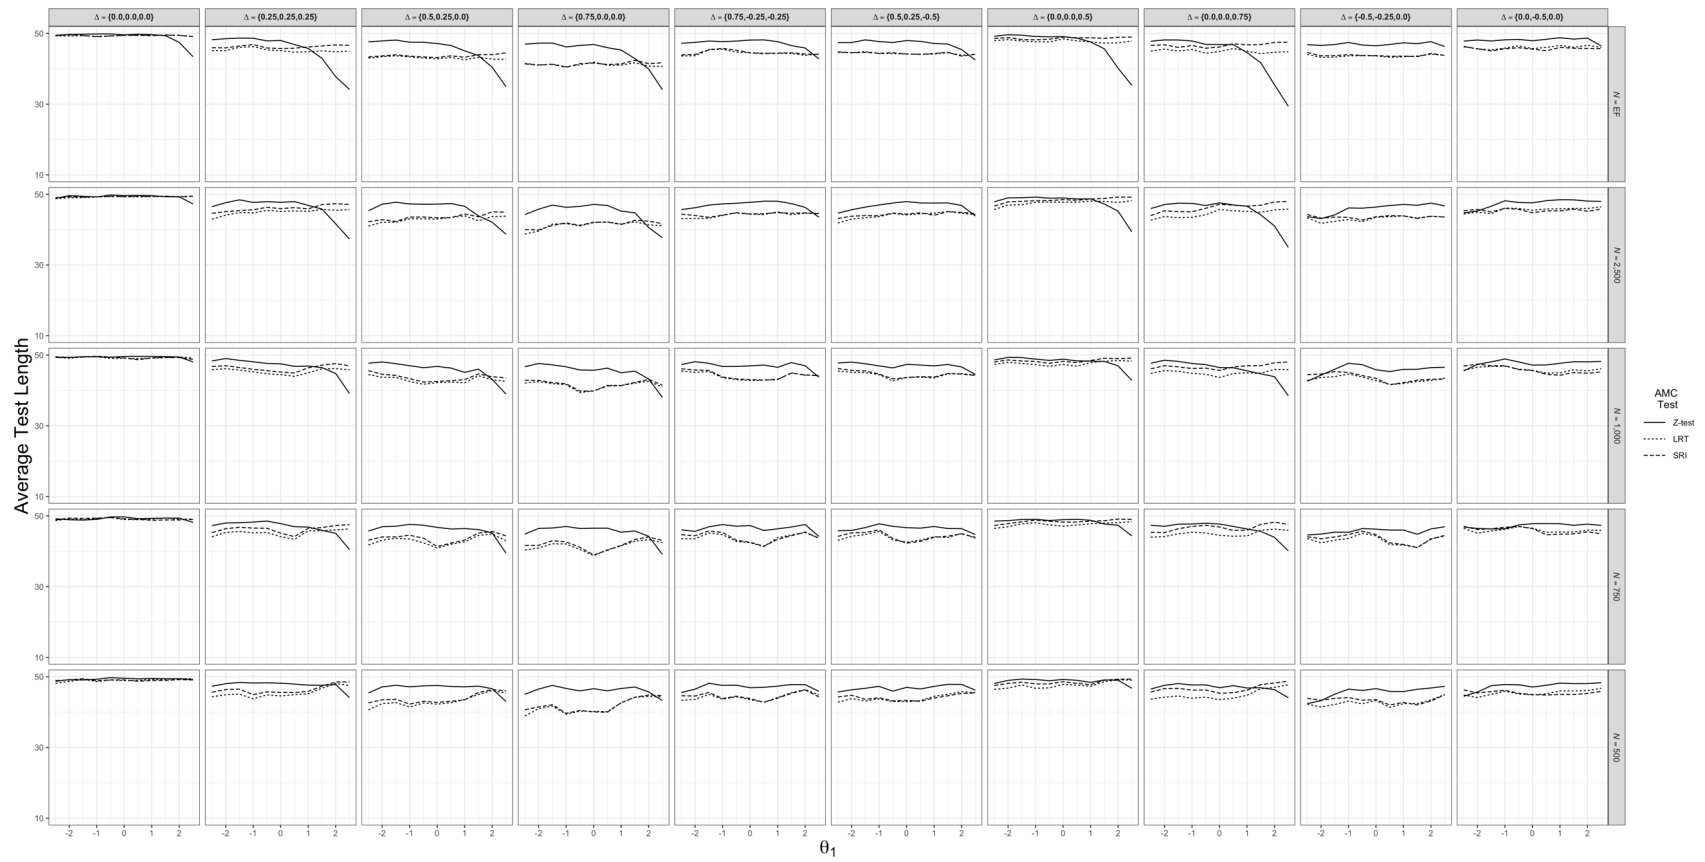

Figure S5. ATL for three AMC hypothesis tests across 10  $\theta$  trajectories when conditioning on  $\theta_1$  in Simulation 2.

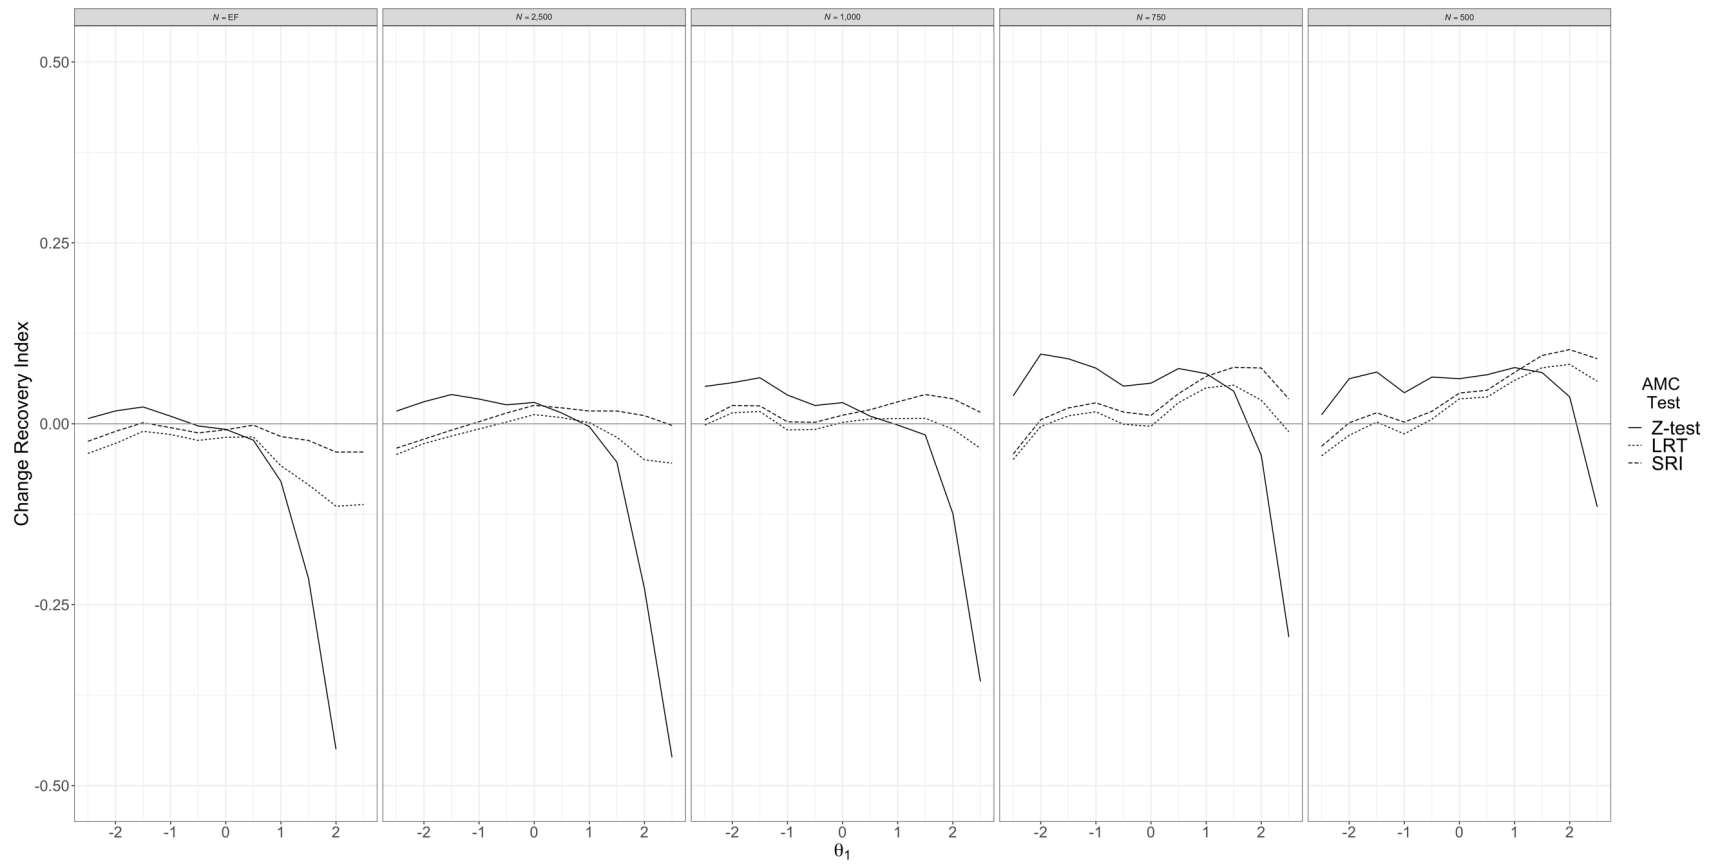

Figure S6. Change recovery index for three AMC hypothesis tests across decreasing calibration sample sizes when conditioning on  $\theta_1$  in Simulation 2.

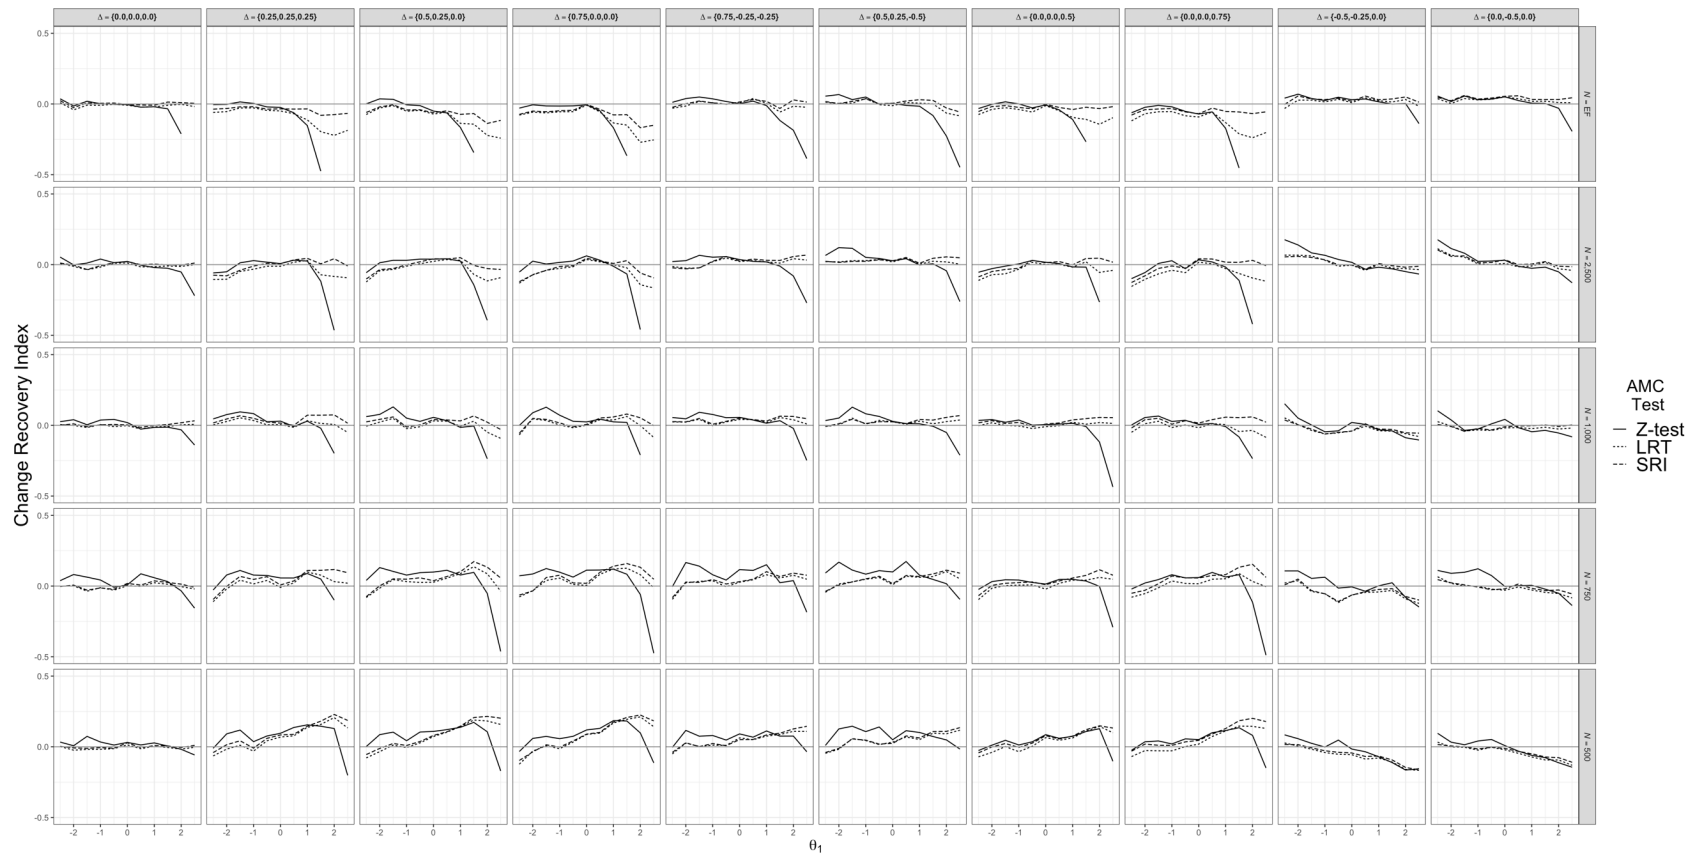

Figure S7. Change recovery index for three AMC hypothesis tests across 10  $\theta$  trajectories when conditioning on  $\theta_1$  in Simulation 2.

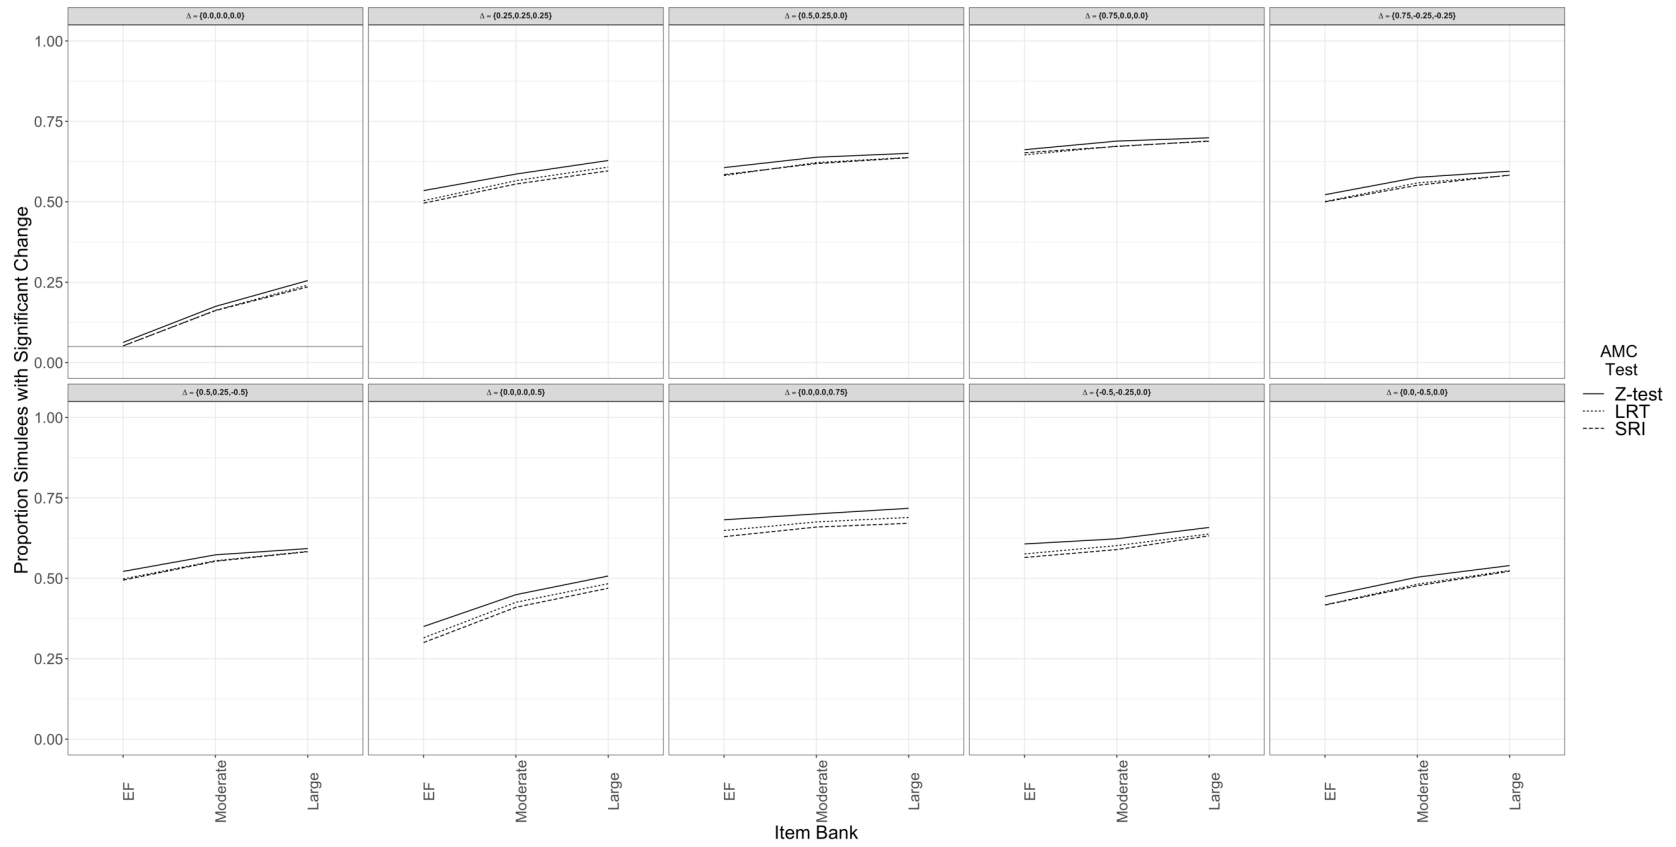

Figure S8. FPRs (Panel 1) and TPRs (Panels 2-10) for three AMC hypothesis tests at the fourth testing occasion across 10  $\theta$  change trajectories in Simulation 3 for item banks with no (EF), moderate, or large calibration error.

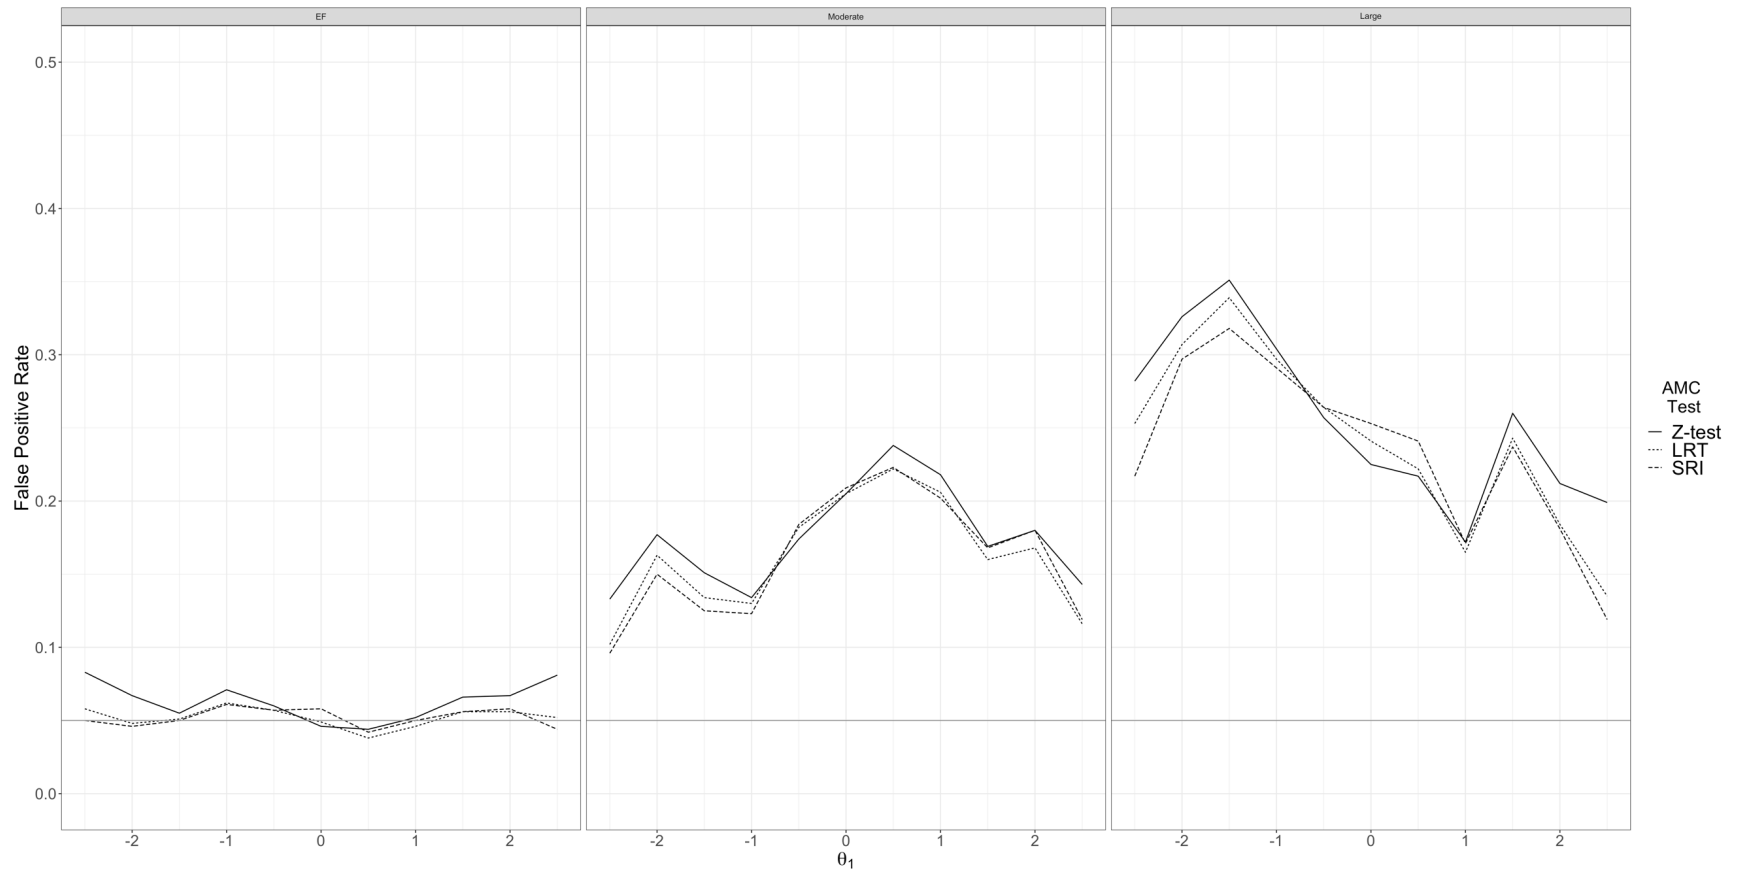

Figure S9. FPRs for three AMC hypothesis tests across item banks with increasing amounts of item parameter estimation error when conditioning on  $\theta_1$  in Simulation 3.

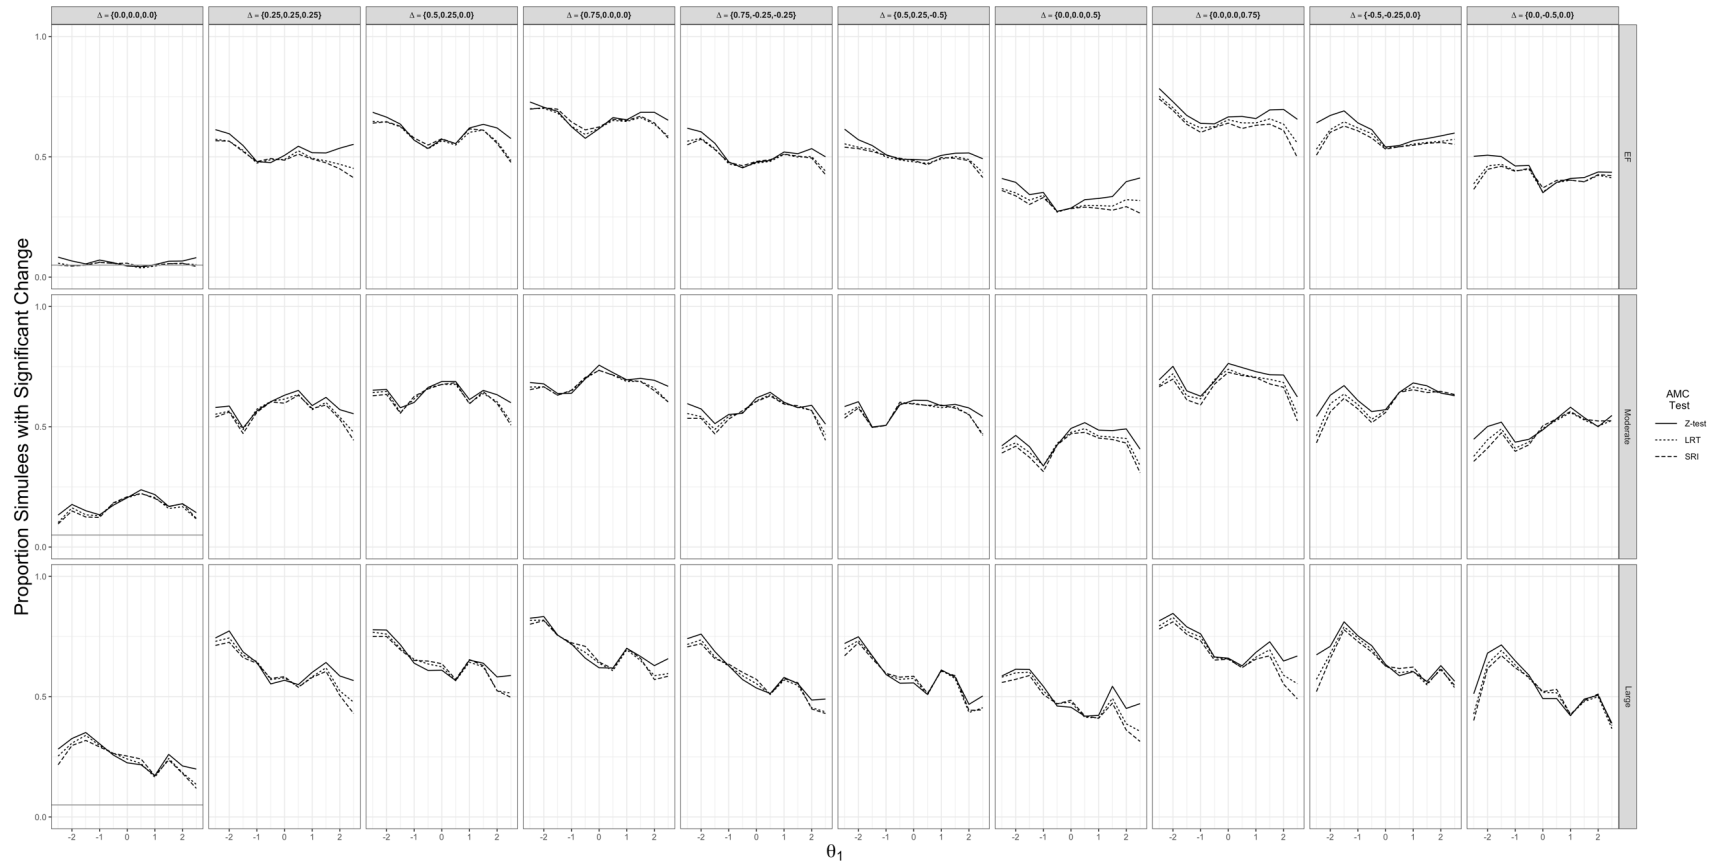

Figure S10. FPRs (Panel 1) and TPRs (Panels 2-10) for three AMC hypothesis tests across 10  $\theta$  change trajectories when conditioning on  $\theta_1$  in Simulation 3.

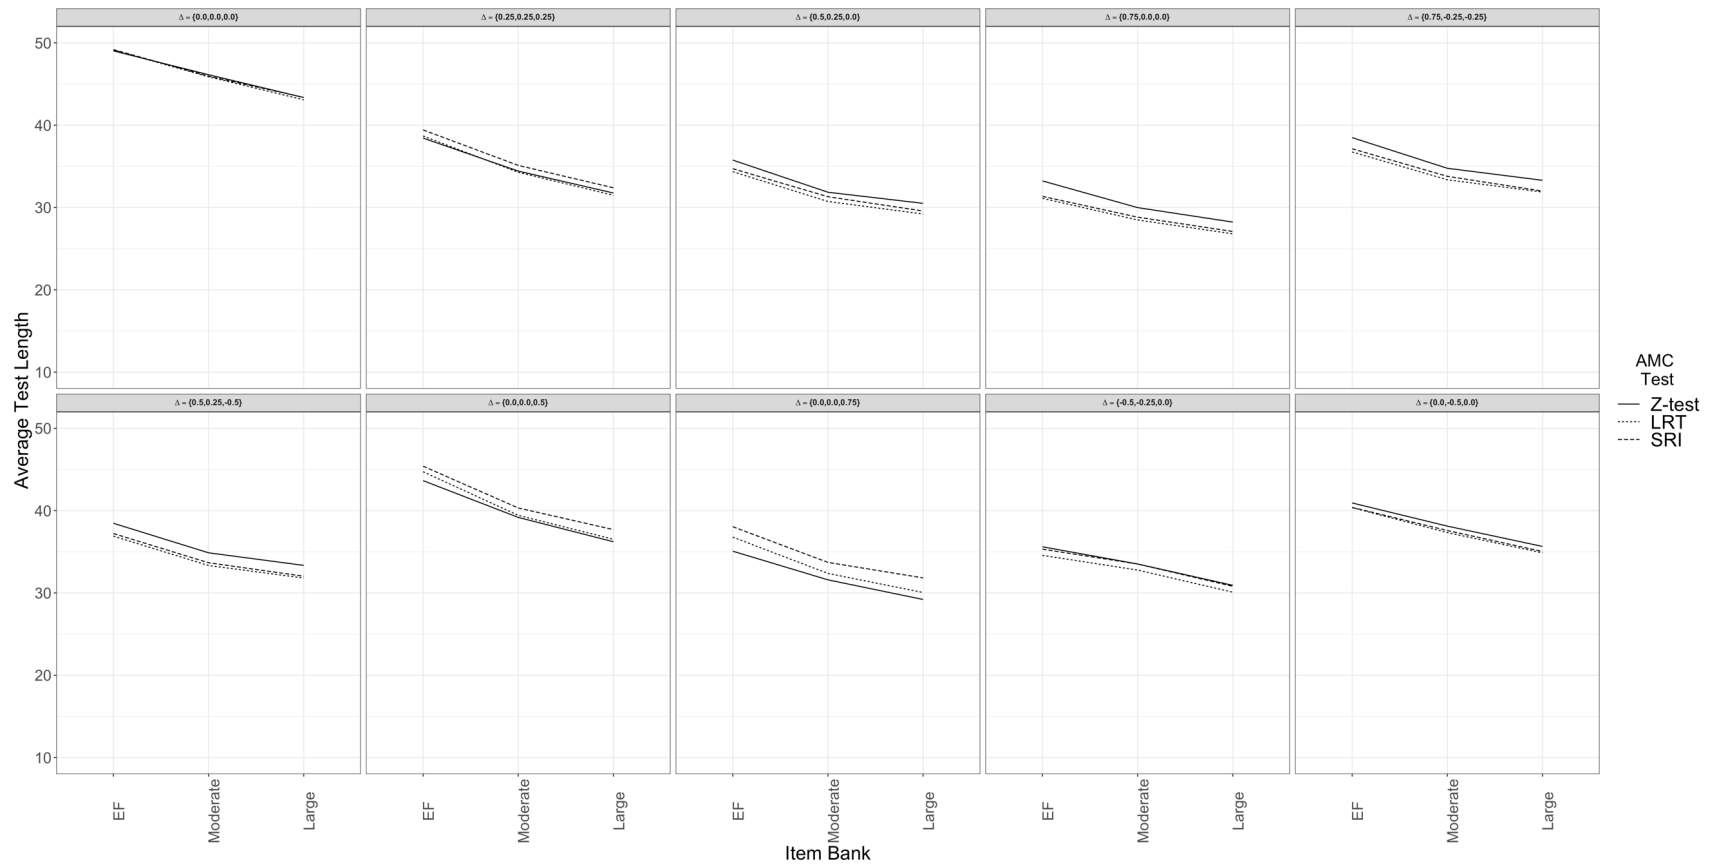

Figure S11. ATL for three AMC hypothesis tests at the fourth testing occasion across 10  $\theta$  change trajectories in Simulation 3 for item banks with no (EF), moderate, or large calibration error.



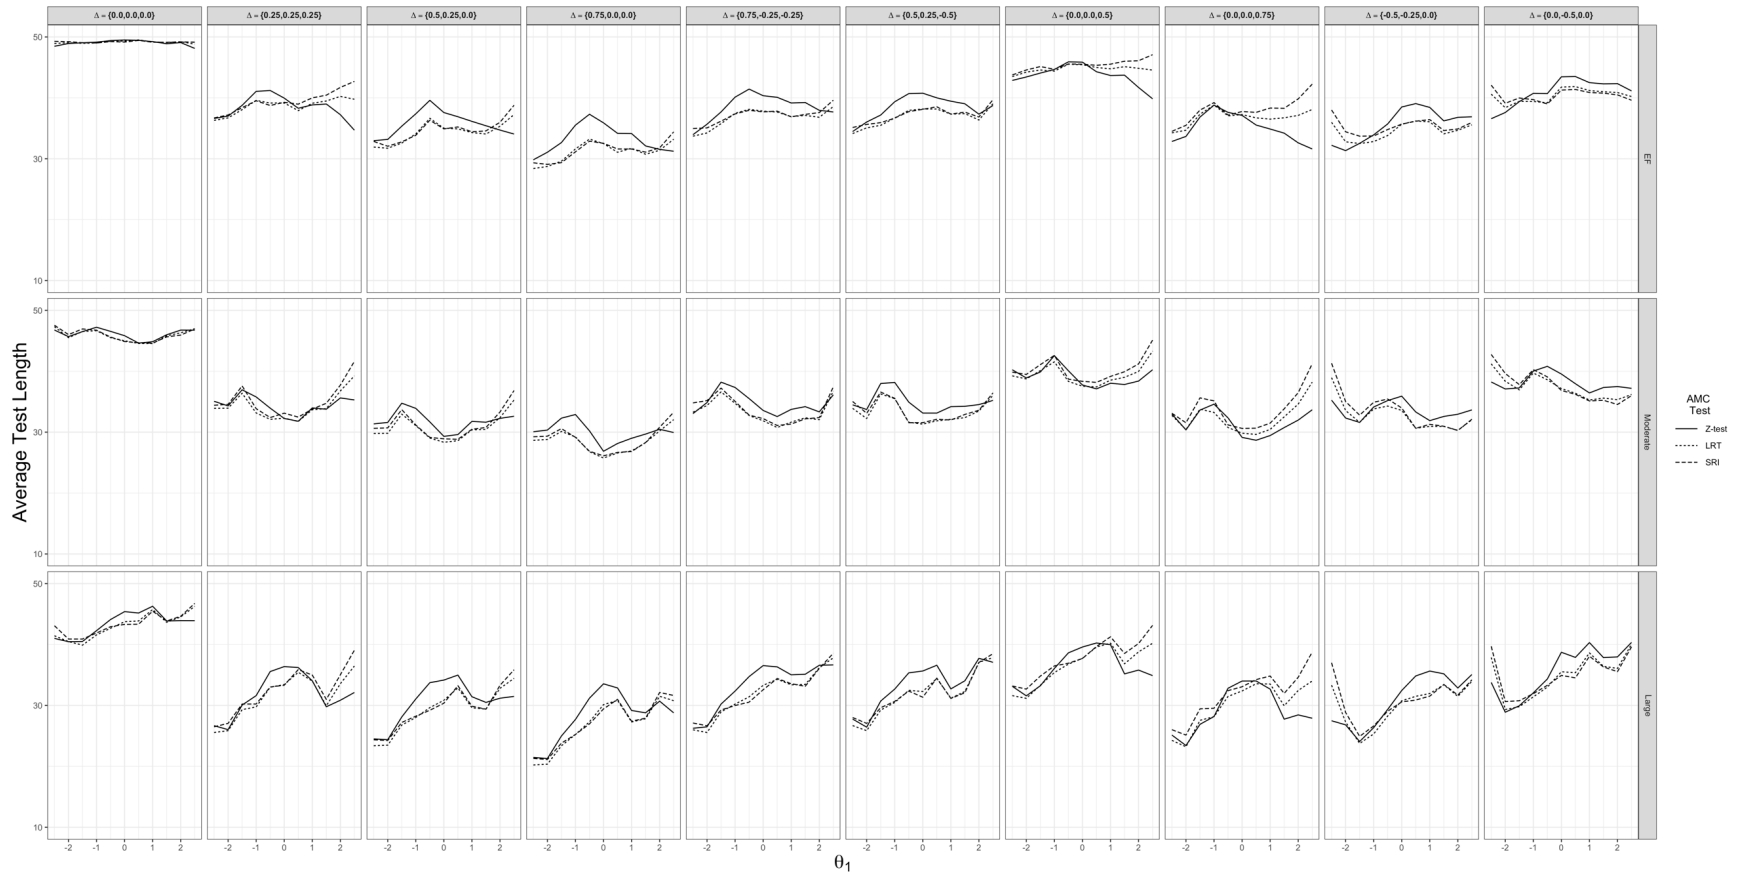

Figure S12. ATL for three AMC hypothesis tests across 10  $\theta$  trajectories when conditioning on  $\theta_1$  in Simulation 3.

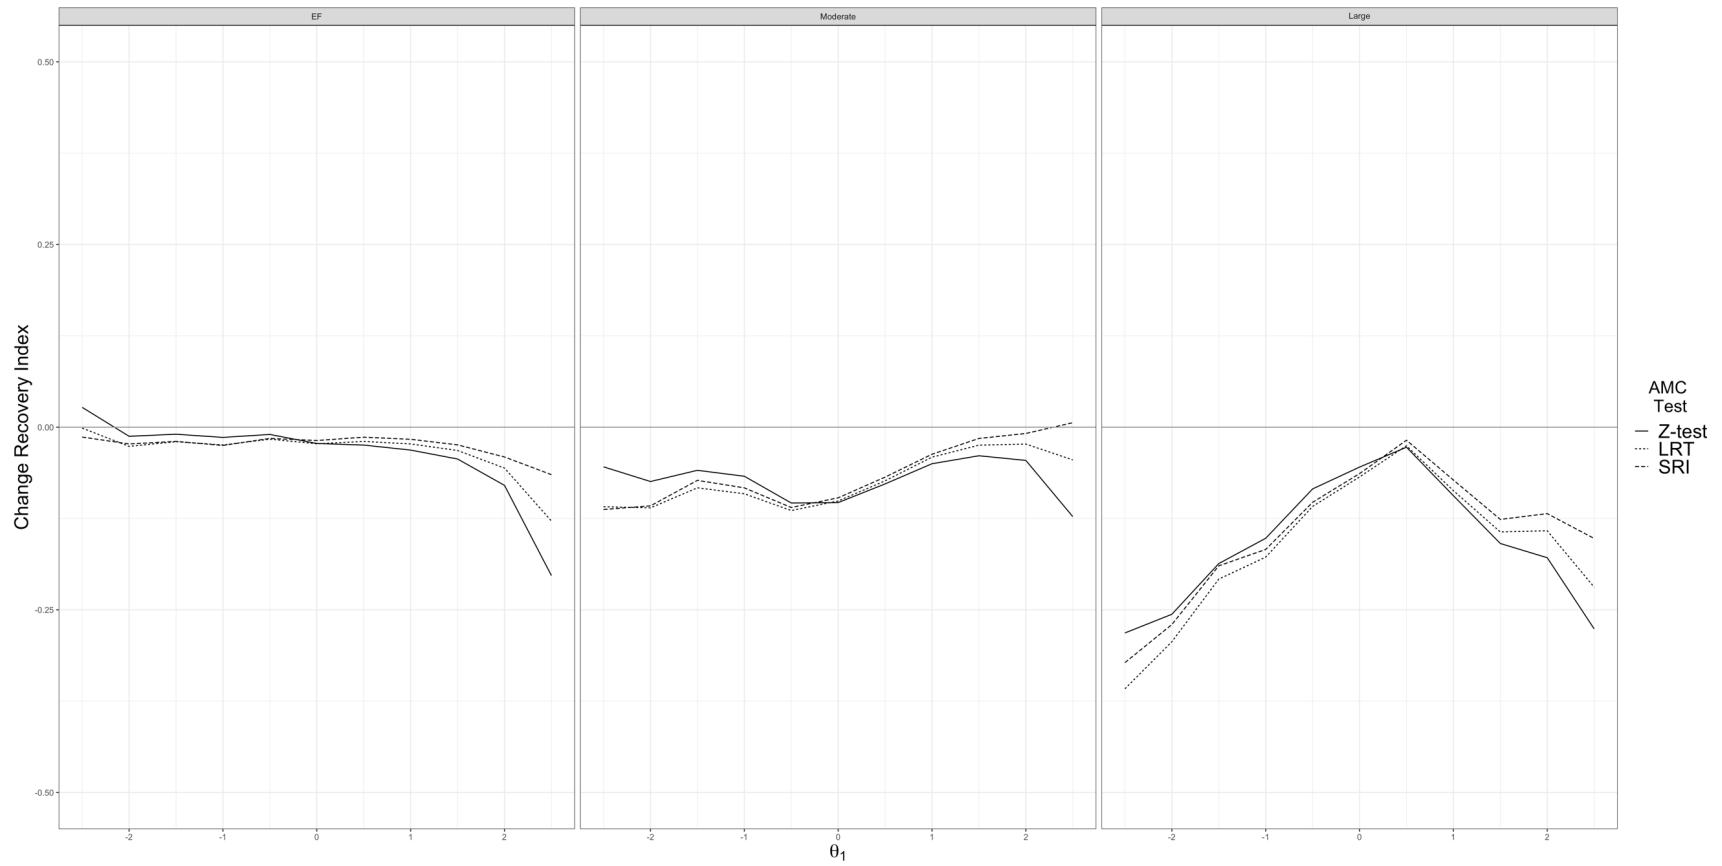

Figure S13. Change recovery index for three AMC hypothesis tests across decreasing calibration sample sizes when conditioning on  $\theta_1$  in Simulation 3.

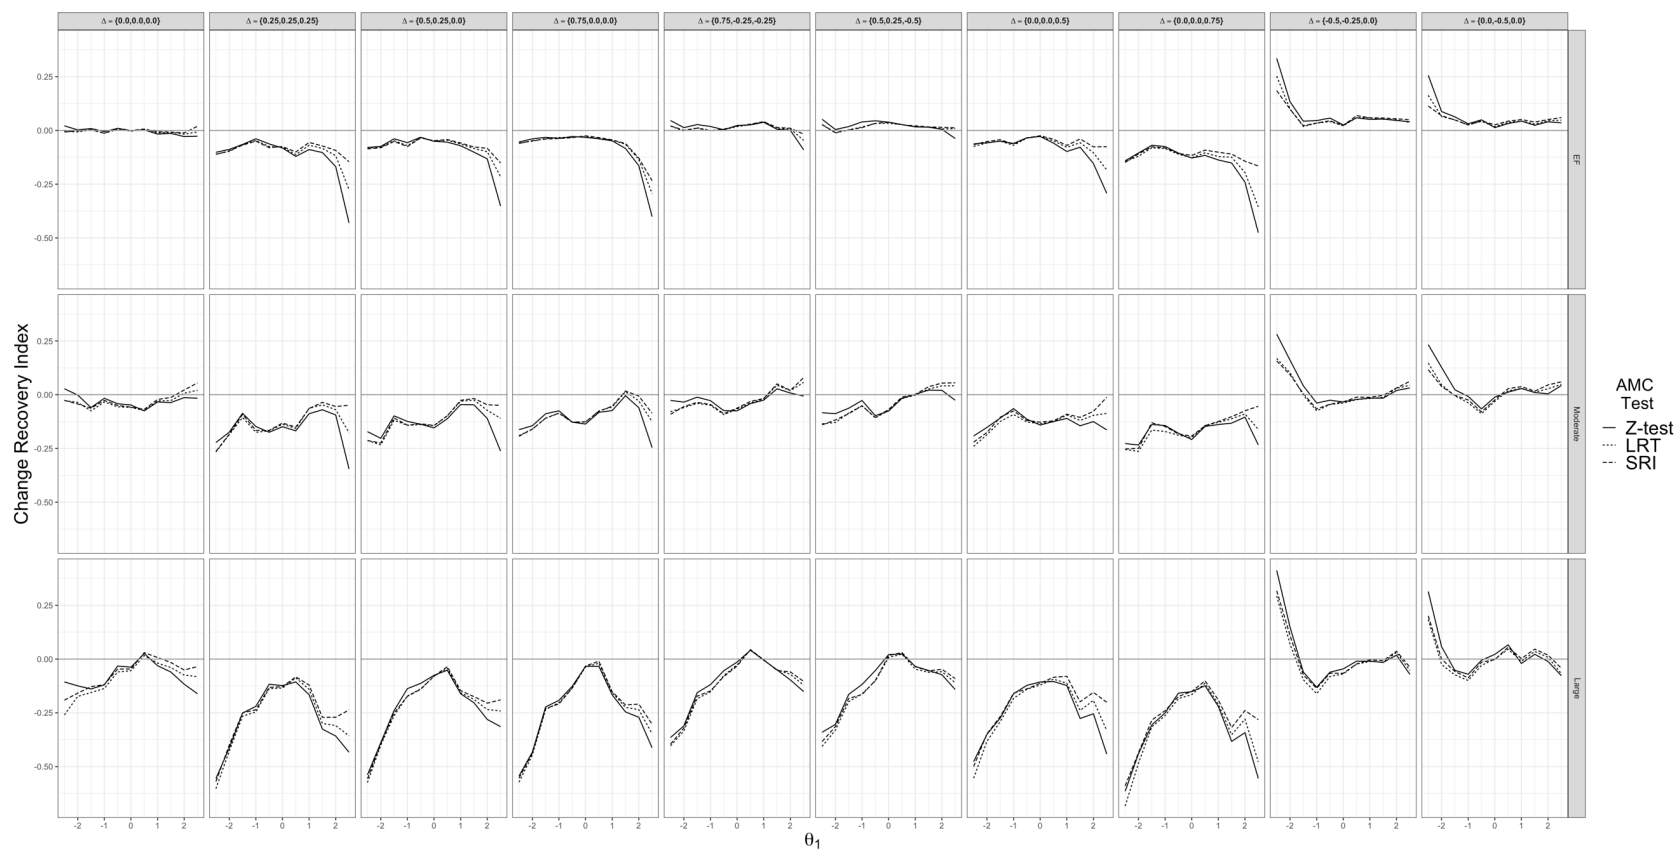

Figure S14. Change recovery index for three AMC hypothesis tests across 10  $\theta$  trajectories when conditioning on  $\theta_1$  in Simulation 3.
